# Supplementary material for: Neonicotinoid Microsphere Immunosensing for Profiling Applications in Honeybees and Bee-Related Matrices
Source: MDPI journal article supplement (doi:10.3390/bios12100792), 2022-09-26
Supplement: s1 [file s1]

# Supporting Information

## Tables

**Table S1.** Details for all neonicotinoid microsphere immunoassays (nMIAs).

| Name      | Microsphere | Main target  | Hapten                     | Antibody                   |
|-----------|-------------|--------------|----------------------------|----------------------------|
| Imi-assay | MC10066     | Imidacloprid | Imidacloprid-OVA (Imi-OVA) | Imidacloprid mAb (Imi mAb) |
| Ace-Assay | MC10064     | Acetamiprid  | Acetamiprid-OVA (Ace-OVA)  | Acetamiprid mAb (Ace mAb)  |
| Clo-Assay | MC10012     | Clothianidin | Clothianidin-OVA (Thc-OVA) | Clothianidin mAb (Clo mAb) |
| Thc-Assay | MC10038     | Thiacloprid  | Thiacloprid-OVA (Thc-OVA)  | Thiacloprid mAb (Thc mAb)  |
| Thm Assay | MC10052     | Thiamethoxam | Thiamethoxam-OVA(Thm-OVA)  | Thiamethoxam mAb (Thm mAb) |

**Table S2.** Collected blank water samples.

| Sample No. | Country of Origin | Sample Location               | Sampling Date |
|------------|-------------------|-------------------------------|---------------|
| 1          | the Netherlands   | Oosterbeek, brook             | 2019/12/30    |
| 2          | the Netherlands   | Saphatipark pond, Amsterdam   | 2019/12/30    |
| 3          | the Netherlands   | Leuvehaven harbour, Rotterdam | 2019/12/28    |
| 4          | the Netherlands   | Stokviswater canal, Rotterdam | 2019/12/28    |
| 5          | Belgium           | Minnewater city lake, Bruges  | 2019/12/30    |
| 6          | Peru              | Aqueduct, Lima                | 2019/12/27    |
| 7          | the Netherlands   | Rhine River, Oosterbeek       | 2019/12/28    |
| 8          | Belgium           | Botanic garden pond, Brussel  | 2019/12/30    |
| 9          | the Netherlands   | Tapwater, Wageningen          | 2019/12/18    |
| 10         | France            | Seine River, Paris            | 2019/12/23    |

**Table S3.** Detection characteristics of the five nMIAs based on four-parameter logistic analysis of the dose-response curves (n=2).

| Assay        | LOD (ng/mL) <sup>1</sup> | IC <sub>50</sub> (ng/mL) <sup>2</sup> | Dynamic Range (ng/mL) <sup>3</sup> | (R <sup>2</sup> ) <sup>4</sup> |
|--------------|--------------------------|---------------------------------------|------------------------------------|--------------------------------|
| Imidacloprid | 0.01                     | 0.07                                  | 0.02-0.17                          | 0.9997                         |
| Acetamiprid  | 0.02                     | 0.26                                  | 0.04-6.10                          | 0.9982                         |
| Clothianidin | 0.19                     | 1.9                                   | 0.51-10                            | 0.9992                         |
| Thiacloprid  | 0.02                     | 0.06                                  | 0.02-1.23                          | 0.9981                         |
| Thiamethoxam | 0.003                    | 0.01                                  | 0.001-0.63                         | 0.9987                         |

<sup>1</sup> Based on average background value of the negative control minus three times the standard deviation, <sup>2</sup> 50% of the maximal inhibitory concentration, <sup>3</sup> dynamic measurement range, set between IC<sub>80</sub> to IC<sub>20</sub>, <sup>4</sup> Coefficient of determination.

**Table S4.** Overview of best neonicotinoid profiling sensitivities based on fortification in surface water by the five nMIAs.

| Neonicotinoid | Imi Assay | Ace Assay | Clo Assay | Thc Assay | Thm Assay |
|---------------|-----------|-----------|-----------|-----------|-----------|
| Imidacloprid  | 1 ng/mL   | -         | -         | 10 ng/mL  | -         |
| Acetamiprid   | 1 ng/mL   | 1 ng/mL   | -         | 1 ng/mL   | -         |
| Clothianidin  | 1 ng/mL   | -         | 10 ng/mL  | 10 ng/mL  | -         |
| Thiacloprid   | 1 ng/mL   | 1 ng/mL   | 10 ng/mL  | 1 ng/mL   | -         |
| Thiamethoxam  | -         | -         | -         | 1 ng/mL   | 1 ng/mL   |
| Dinotefuran   | -         | -         | 1 ng/mL   | -         | -         |
| Nitenpyram    | 1 ng/mL   | -         | -         | -         | -         |
| Imidaclothiz  | 1 ng/mL   | -         | -         | 1 ng/mL   | -         |

"-" means undetectable with the particular assay.

## Figures

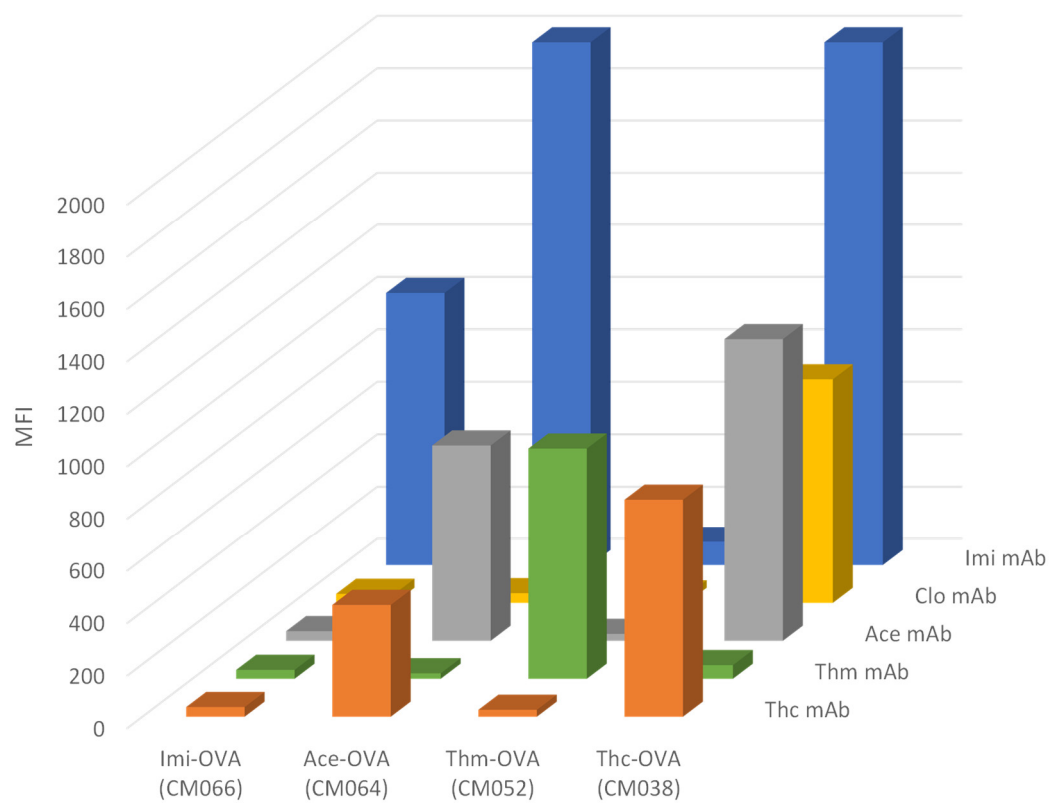

**Figure S1.** Cross-interactions between the neonicotinoid mAbs and the neonicotinoid-OVA conjugates on the microspheres.

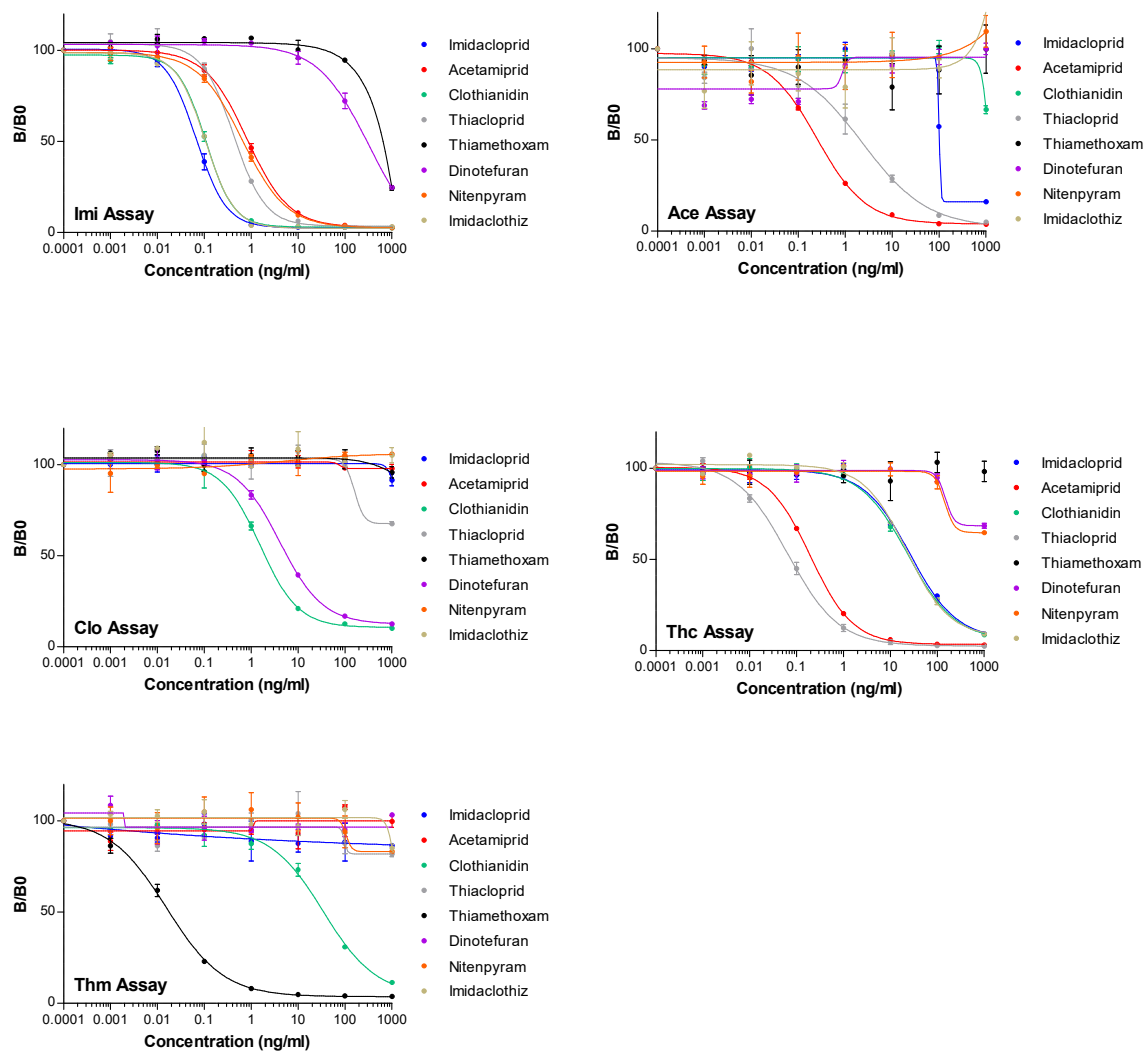

**Figure S2.** Dose-response curves-based cross-reactivity testing for all eight neonicotinoids in the five nMIAs.

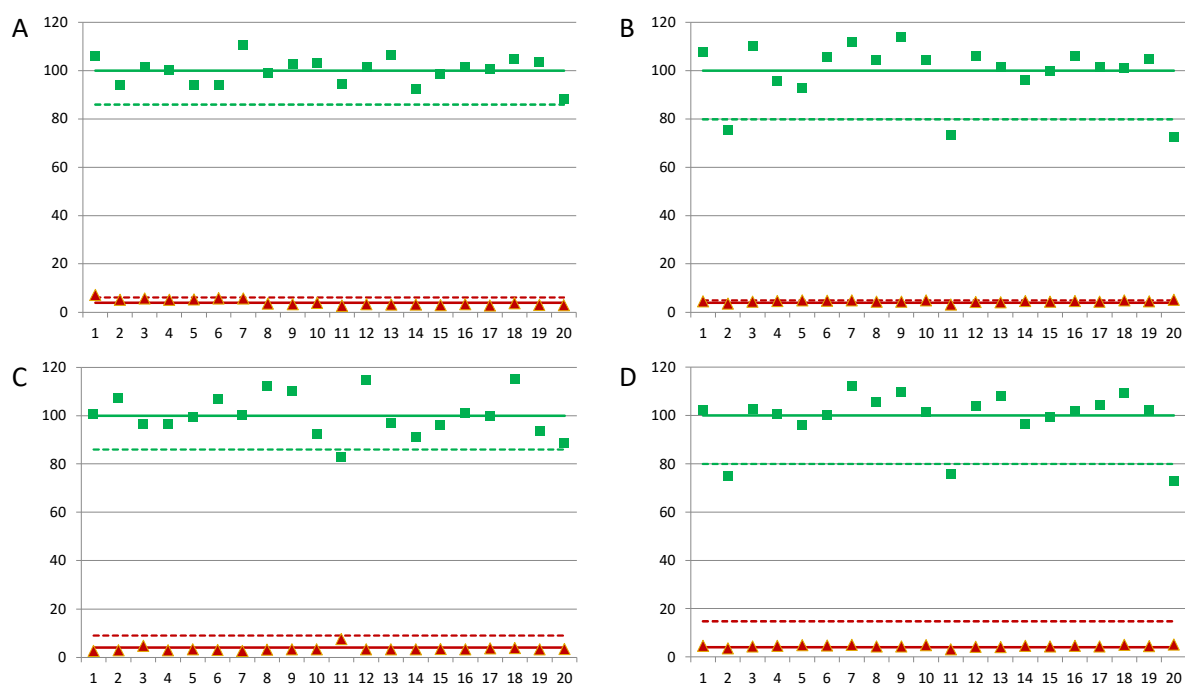

**Figure S3.** Graphical display of the validation results for the Imi (A), Clo (B), Thc (C) and Thm (D) assays for screening application in surface waters. The blank water samples were fortified with 5 ng/mL imidacloprid, clothianidin, thiacloprid and thiamethoxam, and measured with the corresponding nMIA for three consecutive days. Each triangle/square indicates an independent measurement of one sample in triplicate (n=3). The fortified samples are indicated by the red triangles and their mean value is indicated by the red solid lines. The blank samples are indicated by the green squares and their mean value is indicated by the green solid lines. The red dotted lines indicate the cut-off factor (Fm) and the green dotted line indicates the threshold level (T).

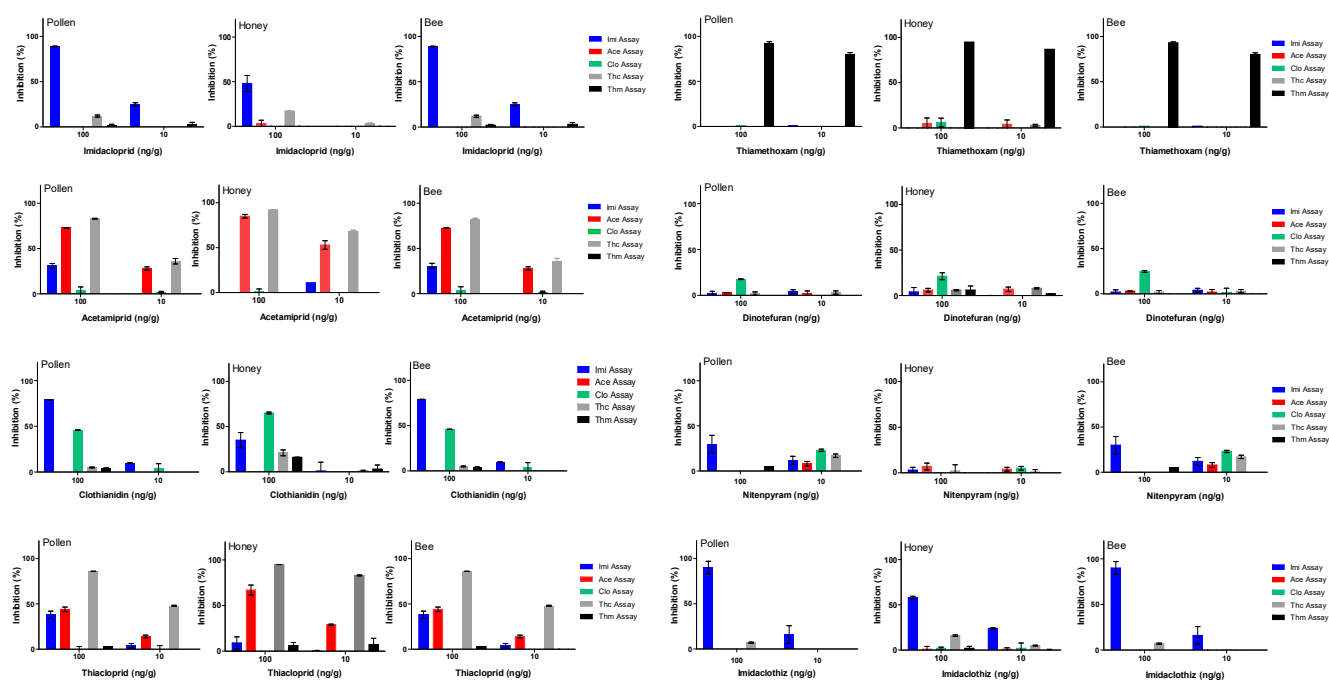

**Figure S4.** Neonicotinoid profiling patterns based on inhibition percentages of the eight common neonicotinoids at 100 and 10 ng/mL in the developed five nMIAs applied to bee-related matrices (pollen, honey and bees).
